# Supplementary material for: miR156- and miR171-Binding Sites in the Protein-Coding Sequences of Several Plant Genes
Source: Hindawi journal article supplement (doi:10.1155/2013/307145), 2013-01-01
Supplement: f1 [file 307145.f1.pdf]

**Supplemental table S1:** Nucleotide variability of miR171 binding sites in mRNA of HAM orthologous genes

| <i>Organism</i>          | Gene accession       | Region of CDS in mRNA of HAM orthologs<br>(the conservative sequence is set in bold) |
|--------------------------|----------------------|--------------------------------------------------------------------------------------|
| <i>A. thaliana</i>       | AT2G45160            | GCAAGG <b>GAU</b> AUUGGCGCGGC <b>UCAA</b> UACCAUCU                                   |
| <i>A. thaliana</i>       | AT3G60630            | GCAAGG <b>GAU</b> AUUGGCGCGGC <b>UCAA</b> UACAACCU                                   |
| <i>A. thaliana</i>       | AT4G00150            | UCAGGG <b>GAU</b> AUUGGCGCGGC <b>UCAA</b> UACAGCU                                    |
| <i>A. lyrata</i>         | ARALYDRAFT_483651    | GCAAGG <b>GAU</b> AUUGGCGCGGC <b>UCAA</b> UACCAUCU                                   |
| <i>A. lyrata</i>         | ARALYDRAFT_486537    | GCAAGG <b>GAU</b> AUUGGCGCGGC <b>UCAA</b> UACAACCU                                   |
| <i>A. lyrata</i>         | ARALYDRAFT_490555    | UCAGGG <b>GAU</b> AUUGGCGCGGC <b>UCAA</b> UACAGCU                                    |
| <i>B. distachyon</i>     | LOC100822245         | ACGCGA <b>GAU</b> AUUGGCGCGGC <b>UCAA</b> UAUCGGCU                                   |
| <i>B. distachyon</i>     | LOC100828697         | GCGAGA <b>GAU</b> AUUGGCGCGGC <b>UCAA</b> UACAGCU                                    |
| <i>B. distachyon</i>     | LOC100834684         | GCGCGA <b>GAU</b> ACUGGCACGGC <b>UCAA</b> UAUCGGCU                                   |
| <i>B. distachyon</i>     | LOC100841394         | CAGGG <b>GAU</b> AUUGGCGCGGC <b>UCAA</b> UACCAUGG                                    |
| <i>G. max</i>            | LOC100792973         | GCAUGG <b>GAU</b> AUUGGCGCGGC <b>UCAA</b> UACCAACU                                   |
| <i>G. max</i>            | LOC100801785         | GCAAGG <b>GAU</b> AUUGGCGCGGC <b>UCAA</b> UACAGCU                                    |
| <i>G. max</i>            | LOC100805945         | GCACGG <b>GAU</b> AUUGGCGCGGC <b>UCAA</b> UACCAACU                                   |
| <i>M. truncatula</i>     | MTR_4g026490         | GCAAGG <b>GAU</b> AUUGGCGCGGC <b>UCAA</b> UACAGCU                                    |
| <i>O. sativa</i>         | Os02g0662700         | GCGAGA <b>GAU</b> AUUGGCGCGGC <b>UCAA</b> UACAGCU                                    |
| <i>O. sativa</i>         | Os02g0663100         | GCGCGA <b>GAU</b> AUUGGCGCGGC <b>UCAA</b> UACAGCU                                    |
| <i>O. sativa</i>         | Os04g0555000         | GCGAGA <b>GAU</b> AUUGGCGCGGC <b>UCAA</b> UAGCAGCU                                   |
| <i>O. sativa</i>         | Os10g0551200         | CCGCGA <b>GAU</b> AUUGGCGCGGC <b>UCAA</b> UAACGGCU                                   |
| <i>P. patens</i>         | PHYPADRAFT_143602    | UAAAGC <b>GAU</b> AUUGGCGCGGC <b>UCAA</b> UAGCACAU                                   |
| <i>P. trichocarpa</i>    | POPTR_409708         | GCAAGG <b>GAU</b> AUUGGCGCGGC <b>UCAA</b> UACAGCU                                    |
| <i>P. trichocarpa</i>    | POPTR_591663         | GCAAGG <b>GAU</b> AUUGGCGCGGC <b>UCAA</b> UACAGCU                                    |
| <i>P. trichocarpa</i>    | POPTR_784409         | GCAAGG <b>GAU</b> AUUGGCGCGGC <b>UCAA</b> UACAGCU                                    |
| <i>P. trichocarpa</i>    | POPTRDRAFT_409708    | GCAAGG <b>GAU</b> AUUGGCGCGGC <b>UCAA</b> UACAGCU                                    |
| <i>R. communis</i>       | RCOM_1062060         | GCAAGG <b>GAU</b> AUUGGCGCGGC <b>UCAA</b> UACAGCU                                    |
| <i>R. communis</i>       | RCOM_1610560         | GCAAGG <b>GAU</b> AUUGGCGCGGC <b>UCAA</b> UACAGCU                                    |
| <i>S. bicolor</i>        | SORBIDRAFT_01g029650 | CCGCGA <b>GAU</b> AUUGGCGCGGC <b>UCAA</b> UAUCGGCU                                   |
| <i>S. bicolor</i>        | SORBIDRAFT_01g050333 | CCGCGA <b>GAU</b> ACUGGCAGGC <b>UCAA</b> CUACCTGCU                                   |
| <i>S. bicolor</i>        | SORBIDRAFT_04g032570 | GCGAGA <b>GAU</b> AUUGGCGCGGC <b>UCAA</b> UACAGCU                                    |
| <i>S. bicolor</i>        | SORBIDRAFT_04g032590 | GCGAGA <b>GAU</b> AUUGGCGCGGC <b>UCAA</b> UACAGCU                                    |
| <i>S. bicolor</i>        | SORBIDRAFT_06g024820 | GCUCGA <b>GAU</b> AUUGGCGCGGC <b>UCAA</b> UAGCAGCU                                   |
| <i>S. moellendorffii</i> | SELMODRAFT_453332    | UCAGUC <b>GAU</b> AUUGGCGCGGC <b>UCAA</b> UAGCAUUU                                   |
| <i>V. vinifera</i>       | LOC100267664         | GCAAGG <b>GAU</b> AUUGGCGCGGC <b>UCAA</b> UACAGCU                                    |
| <i>Z. mays</i>           | LOC100272800         | GCGCGA <b>GAU</b> AUUGGCGCGGC <b>UCAA</b> UACGGCU                                    |
| <i>Z. mays</i>           | LOC100279263         | GCGAGA <b>GAU</b> AUUGGCGCGGC <b>UCAA</b> UACAGCU                                    |
| <i>Z. mays</i>           | LOC100279420         | GCGAGC <b>GAU</b> AUUGGCGCGGC <b>UCAA</b> UACAGCU                                    |
| <i>Z. mays</i>           | LOC100381701         | GCGCGA <b>GAU</b> AUUGGCGCGGC <b>UCAA</b> UAGCAGCU                                   |
| <i>Z. mays</i>           | LOC100382187         | GCGAGA <b>GAU</b> AUUGGCGCGGC <b>UCAA</b> UAGCAGCU                                   |

**Supplemental Table S2: Amino acid variability of HAM orthologous proteins in regions with the ILARLN oligopeptide**

| <i>Organism</i>          | Gene accession       | Region of HAM orthologous protein (the conservative sequence is set in bold) |
|--------------------------|----------------------|------------------------------------------------------------------------------|
| <i>A. thaliana</i>       | AT2G45160            | TVLAQG <b>ILARLN</b> HHLNTS                                                  |
| <i>A. thaliana</i>       | AT3G60630            | PVLAQG <b>ILARLN</b> HNLNNN                                                  |
| <i>A. thaliana</i>       | AT4G00150            | TCLAQG <b>ILARLN</b> QQLSSP                                                  |
| <i>A. lyrata</i>         | ARALYDRAFT_483651    | TVLAQG <b>ILARLN</b> HHLNTS                                                  |
| <i>A. lyrata</i>         | ARALYDRAFT_486537    | PVLAQG <b>ILARLN</b> HNLNNN                                                  |
| <i>A. lyrata</i>         | ARALYDRAFT_490555    | TCLAQG <b>ILARLN</b> QQLSSP                                                  |
| <i>B. distachyon</i>     | LOC100822245         | AHGARE <b>ILARLN</b> YRLPAA                                                  |
| <i>B. distachyon</i>     | LOC100828697         | STGARE <b>ILARLN</b> HQLPPV                                                  |
| <i>B. distachyon</i>     | LOC100834684         | GFGARE <b>ILARLN</b> HRLPAA                                                  |
| <i>B. distachyon</i>     | LOC100841394         | STGARE <b>ILARLN</b> HHLPLP                                                  |
| <i>G. max</i>            | LOC100792973         | LELAHG <b>ILARLN</b> HQLSPI                                                  |
| <i>G. max</i>            | LOC100801785         | PVHAQG <b>ILARLN</b> HQLSPI                                                  |
| <i>G. max</i>            | LOC100805945         | LELAHG <b>ILARLN</b> HQLSPI                                                  |
| <i>M. truncatula</i>     | MTR_4g026490         | PVQAQG <b>ILARLN</b> HQLSPI                                                  |
| <i>O. sativa</i>         | Os02g0662700         | SVGARE <b>ILARLN</b> QQLPQL                                                  |
| <i>O. sativa</i>         | Os02g0663100         | SVGARE <b>ILARLN</b> QQLPPL                                                  |
| <i>O. sativa</i>         | Os04g0555000         | SIGARE <b>ILARLN</b> QQLPPI                                                  |
| <i>O. sativa</i>         | Os10g0551200         | AFGARE <b>ILARLN</b> YRLPAA                                                  |
| <i>P. trichocarpa</i>    | POPTR_409708         | PVLAQG <b>ILARLN</b> HQLSVP                                                  |
| <i>P. trichocarpa</i>    | POPTR_591663         | PVLAQG <b>ILARLN</b> HQLSLP                                                  |
| <i>P. trichocarpa</i>    | POPTR_784409         | FLHAQG <b>ILARLN</b> QQLSPT                                                  |
| <i>P. trichocarpa</i>    | POPTRDRAFT_409708    | PVLAQG <b>ILARLN</b> HQLSVP                                                  |
| <i>P. patens</i>         | PHYPADRAFT_143602    | AEMAKA <b>ILARLN</b> QHISPS                                                  |
| <i>R. communis</i>       | RCOM_1062060         | FSHAQG <b>ILARLN</b> QQLSPI                                                  |
| <i>R. communis</i>       | RCOM_1610560         | PALAQG <b>ILARLN</b> HQLSLS                                                  |
| <i>S. bicolor</i>        | SORBIDRAFT_01g029650 | AFGARE <b>ILARLN</b> YRLPAV                                                  |
| <i>S. bicolor</i>        | SORBIDRAFT_01g050333 | VLGARE <b>ILARLN</b> YLLPPA                                                  |
| <i>S. bicolor</i>        | SORBIDRAFT_04g032570 | SIGARE <b>ILARLN</b> HQLPPL                                                  |
| <i>S. bicolor</i>        | SORBIDRAFT_04g032590 | SIGARE <b>ILARLN</b> HQLPPL                                                  |
| <i>S. bicolor</i>        | SORBIDRAFT_06g024820 | SIGALE <b>ILARLN</b> QQLPPV                                                  |
| <i>S. moellendorffii</i> | SELMODRAFT_453332    | NHVAQS <b>ILARLN</b> QHFLCH                                                  |
| <i>V. vinifera</i>       | LOC100267664         | TILAQG <b>ILARLN</b> HQLSPI                                                  |
| <i>Z. mays</i>           | LOC100272800         | STGARE <b>ILARLN</b> HRLPSP                                                  |
| <i>Z. mays</i>           | LOC100279263         | SIGARE <b>ILARLN</b> HQLPLL                                                  |
| <i>Z. mays</i>           | LOC100279420         | SIGARA <b>ILARLN</b> HQLPPL                                                  |
| <i>Z. mays</i>           | LOC100381701         | SIGGRE <b>ILARLN</b> QQLPPI                                                  |
| <i>Z. mays</i>           | LOC100382187         | SIGARE <b>ILARLN</b> QQLPPI                                                  |
